# Supplementary material
Source: Springer Nature journal article supplement (https://www.springermedizin.de/resource/supplementary/12968_2012_3286_MOESM28_ESM.pdf/9583546)

**A**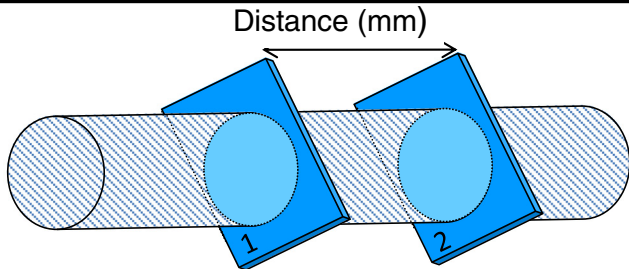**B**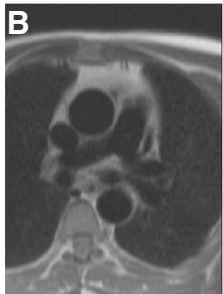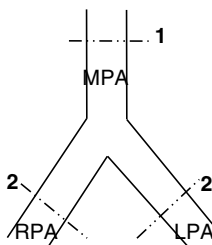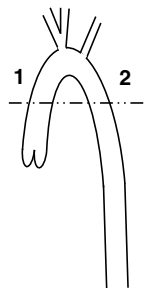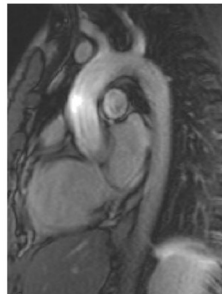**C**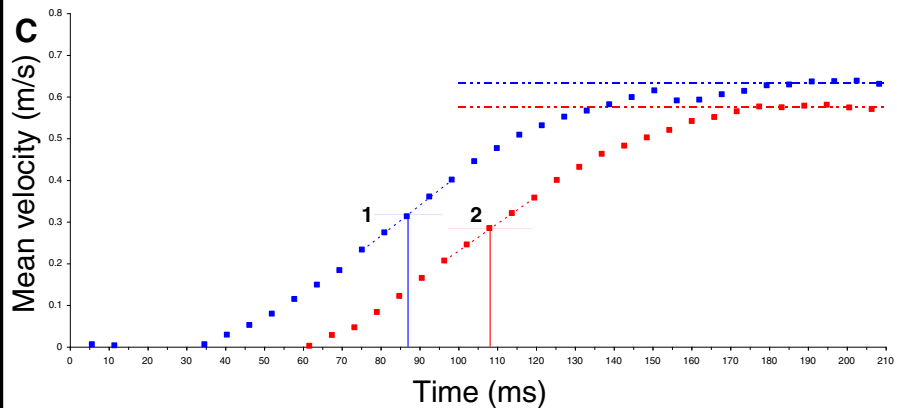**D**

$$\text{PWV} = \text{Transit Time} (\text{AT}^2 - \text{AT}^1) / \text{Distance}$$

Supplement: MOESM28 [file 9583546]
